# Supplementary material for: Controlling interfacial electron transfer and electrocatalysis by pH- or ion-switchable DNA monolayer-modified electrodes
Source: Royal Society of Chemistry journal article supplement (doi:10.1039/c2sc22193d), 2012-12-18
Supplement: c2sc22193d.pdf [file c2sc22193d.pdf]

Supplementary information for the paper:

## **Controlling Interfacial Electron Transfer and Electrocatalysis by pH- or Ion-Switchable DNA Monolayer-Modified Electrodes**

**Gilad Pelossof, Ran Tel-Vered, Simcha Shimron, Itamar Willner,\***

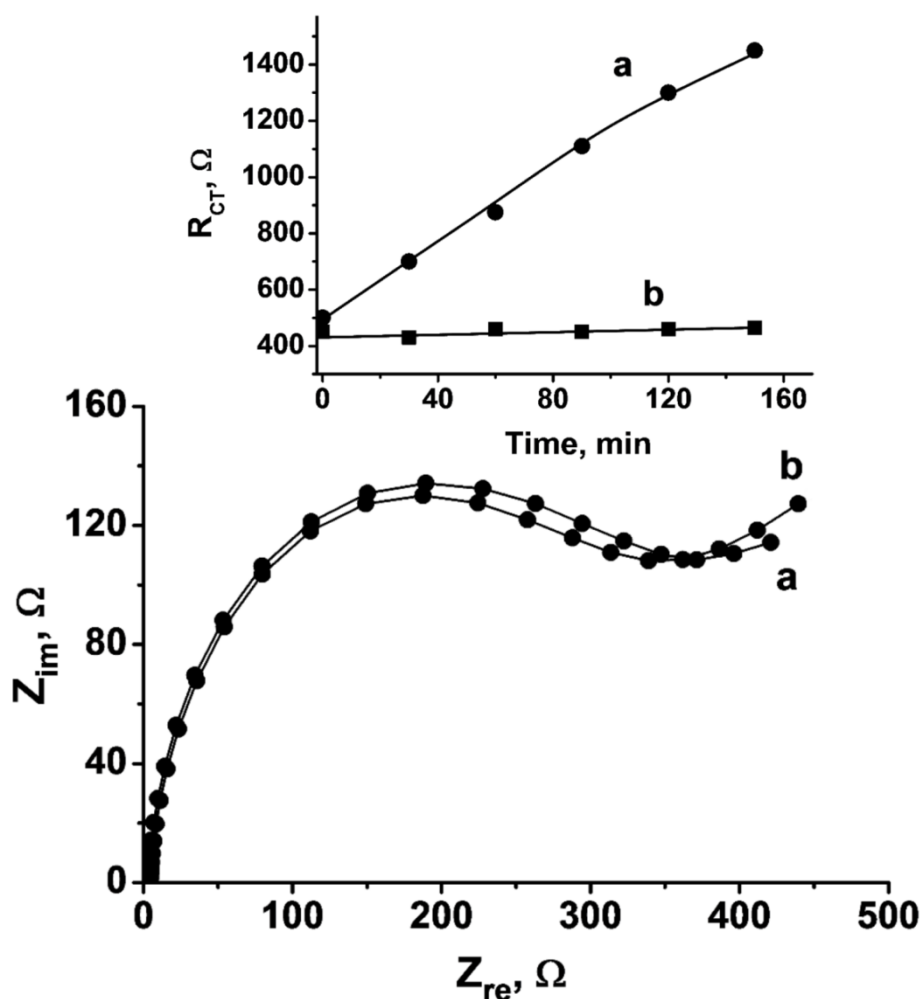

**Figure S1.** Faradaic impedance spectra (in the form of Nyquist plots) recorded during the RCA polymerization of the (2)-modified Au electrode in the presence of a thermally-denatured (60°C, 15 minutes) Phi29 DNAPolymerase: (a) Before polymerization, and, (b) After 150 minutes polymerization. Inset: Interfacial electron transfer resistances recorded during the RCA polymerization of the (2)-modified Au electrode, in the presence of: (a) Phi29 DNAPolymerase, and (b) Thermally-denatured Phi29 DNAPolymerase. Measurements were performed in MES buffer, 0.1 M, that included  $\text{Fe}(\text{CN})_6^{3-/4-}$ , 1 mM. Data was recorded in the frequency range of 10 kHz to 100 mHz at  $E=0.17$  V vs. SCE, using an alternate perturbation potential of  $\pm 10$  mV.

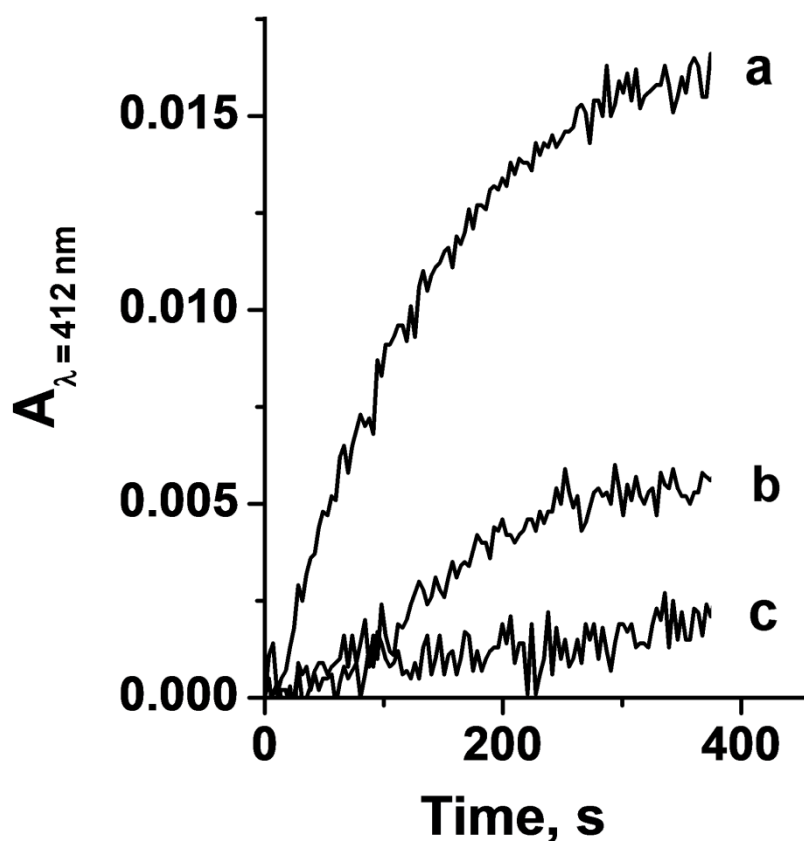

**Figure S2.** Time-dependant ABTS<sup>-</sup> absorption (at  $\lambda=412$  nm), recorded for a 200  $\mu\text{L}$  tris acetate buffer solution (0.1 M, pH 7.0) containing 200  $\mu\text{M}$  ABTS<sup>2-</sup>, 200  $\mu\text{M}$  H<sub>2</sub>O<sub>2</sub> and 0.5  $\mu\text{M}$  hemin, and interacted with: (a) The (**4**)-modified Au electrode, in the presence of 0.1 M KCl; (b) The (**4**)-modified Au electrode, in the absence of KCl; (c) The (**1a**)-modified Au electrode, in the presence of 0.1 M KCl.
